# Supplementary material for: Genome assembly using Nanopore-guided long and error-free DNA reads
Source: PubMed Central journal article supplement (PMC4460631; doi:10.1186/s12864-015-1519-z), 2015-04-20
Supplement: 12864_2015_1519_MOESM1_ESM.pdf [file 12864_2015_1519_MOESM1_ESM.pdf]

# Genome assembly using Nanopore-guided Long and Error-free DNA Reads

**Mohammed-Amin Madoui<sup>1\*</sup>, Stefan Engelen<sup>1\*</sup>, Corinne Cruaud<sup>1</sup>, Caroline Belser<sup>1</sup>, Laurie Bertrand<sup>1</sup>, Adriana Alberti<sup>1</sup>, Arnaud Lemainque<sup>1</sup>, Patrick Wincker<sup>1,2,3</sup>, Jean-Marc Aury<sup>1§</sup>**

<sup>1</sup>Commissariat à l’Energie Atomique (CEA), Institut de Génomique (IG), Genoscope, BP5706, 91057 Evry, France

<sup>2</sup>Université d’Evry Val d’Essonne, UMR 8030, CP5706, 91057 Evry, France.

<sup>3</sup>Centre National de Recherche Scientifique (CNRS), UMR 8030, CP5706, 91057 Evry, France

\*These authors contributed equally to this work

<sup>§</sup>Corresponding author

## Supplementary Figures and Tables

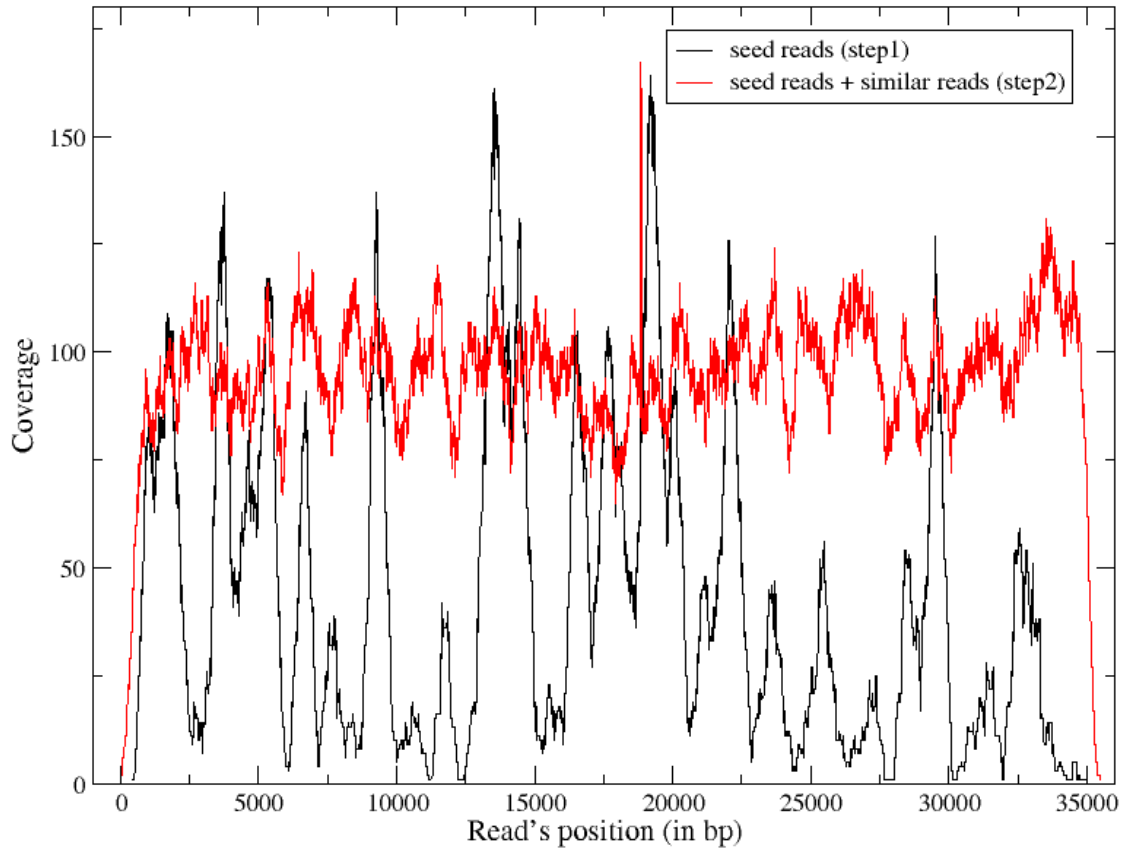

**Figure S1.** Distribution of Illumina read coverage along a 35-kb MinION® read. The black line represents coverage after the first step (BLAT alignment to find *seed-reads*) and the red line represents coverage after the recruitment step (comparison of *seed-reads* against the whole set of Illumina reads).

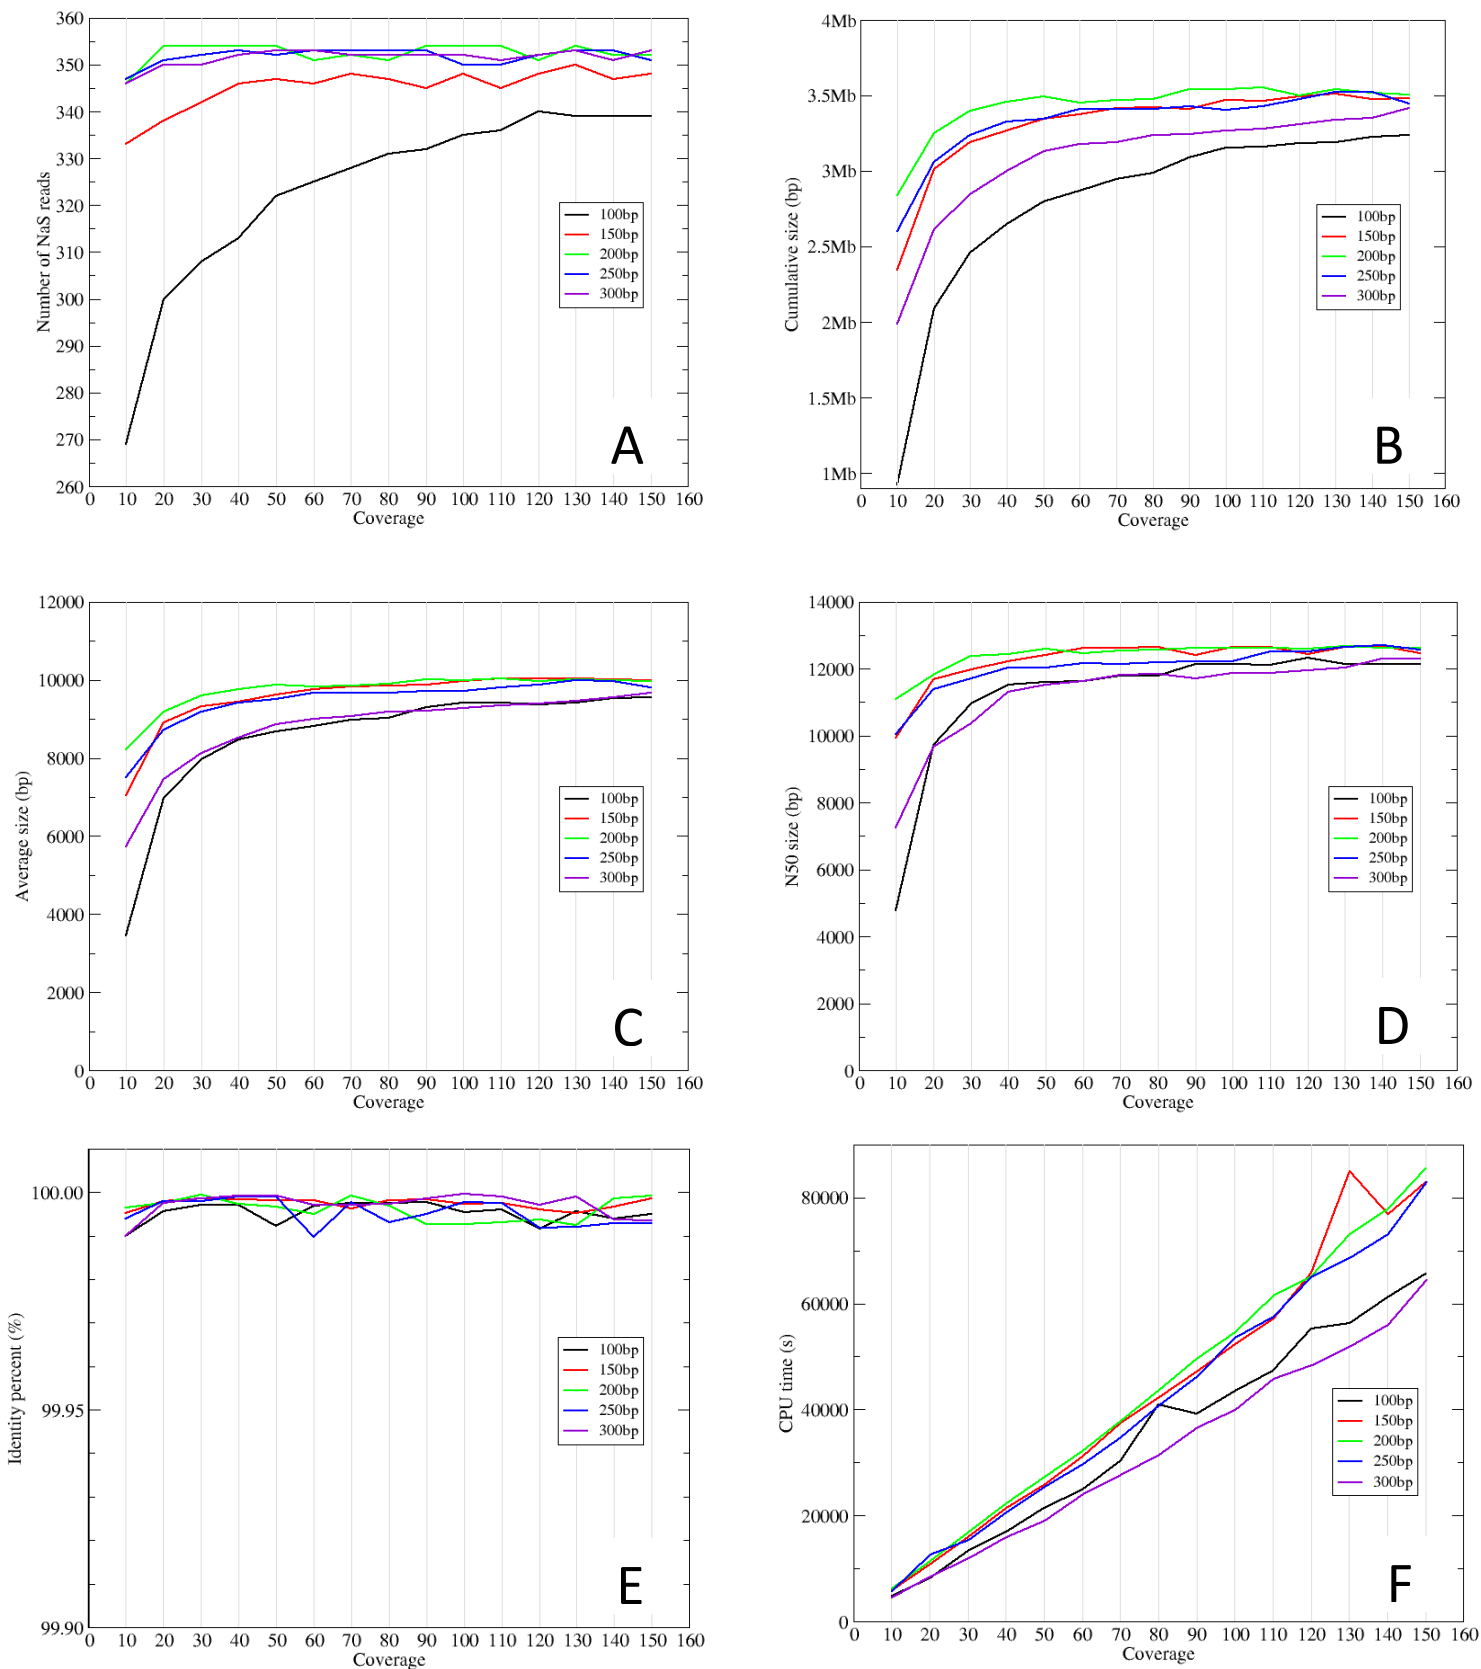

**Figure S2.** Impact of Illumina coverage and read length on NaS reads. The x-axis represents genome coverage from 10x to 150x. Each curve represents a given read length: 100bp (black), 150bp (red), 200bp (green), 250bp (blue) and 300bp (purple). This benchmark was achieved on 2D reads from run2 (library 20Kb and R7 chemistry). **A.** Number of produced NaS reads. **B.** Cumulative size (in bp) of NaS reads. **C.** Average size (in bp) of NaS reads. **D.** N50 size (in bp) of NaS reads. **E.** Identity of NaS reads aligned to the reference genome. **F.** CPU time (in seconds).

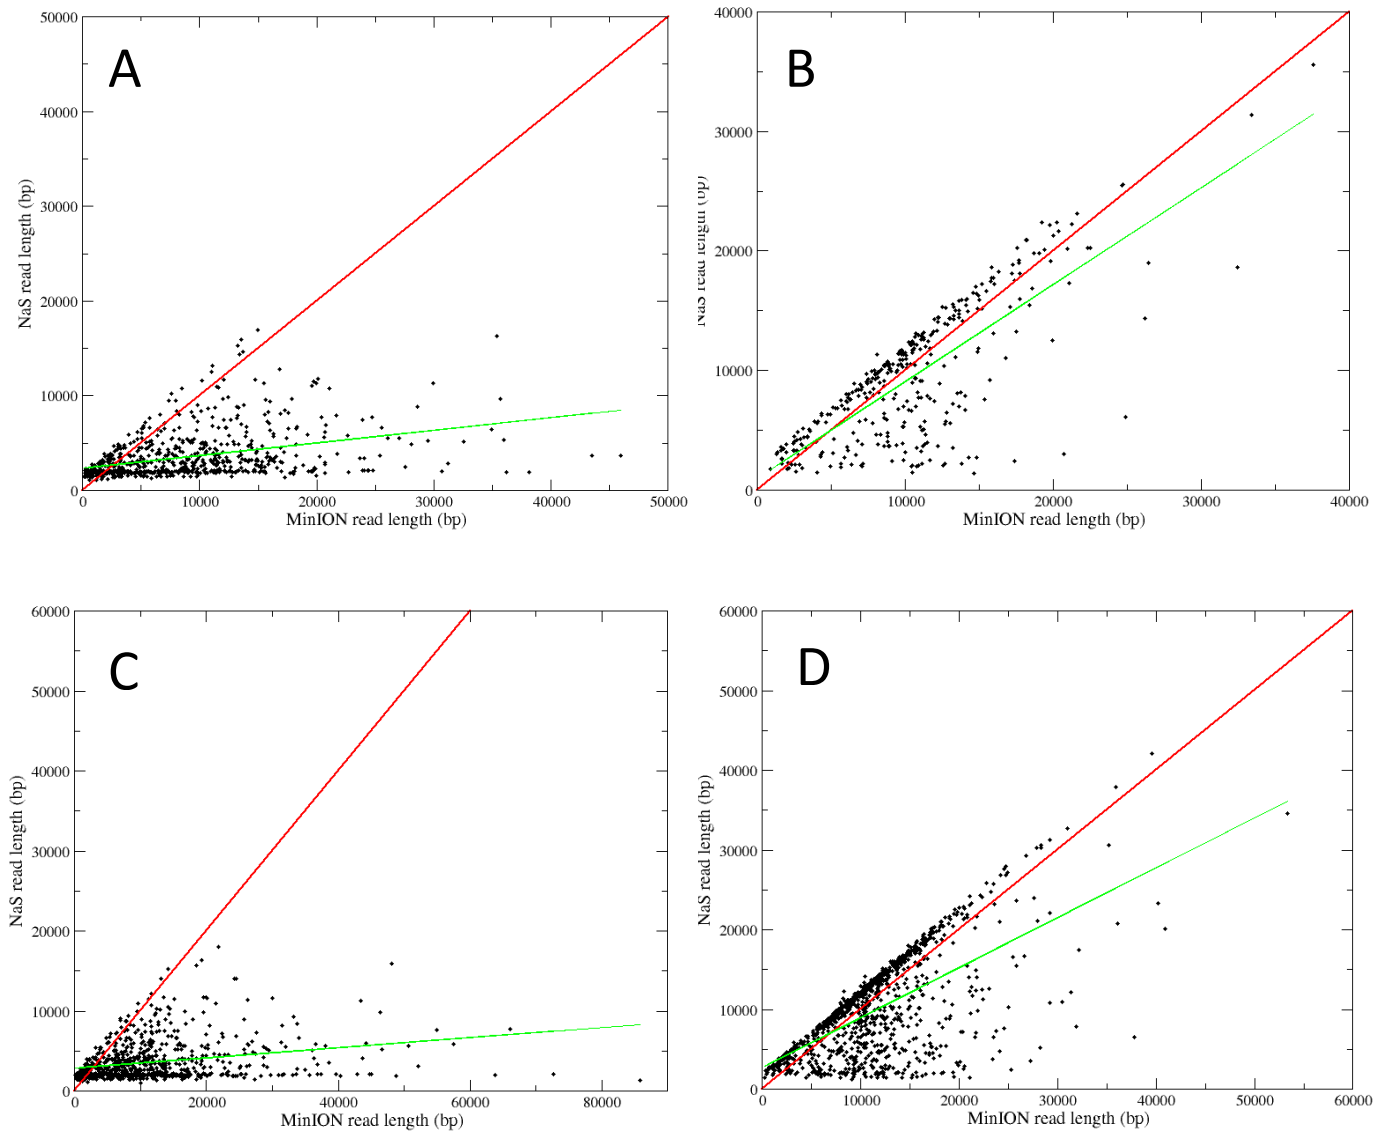

**Figure S3.** Comparison of MinION® (x axis) and NaS (y axis) read length. Red lines represent  $x=y$ , and green lines are linear regressions. **A.** 1D reads from run2 (20-kb library and R7 chemistry). **B.** 2D reads from run2 (20-kb library and R7 chemistry). **C.** 1D reads from run4 (20-kb library and R7.3 chemistry). **D.** 2D reads from run4 (20-kb library and R7.3 chemistry).

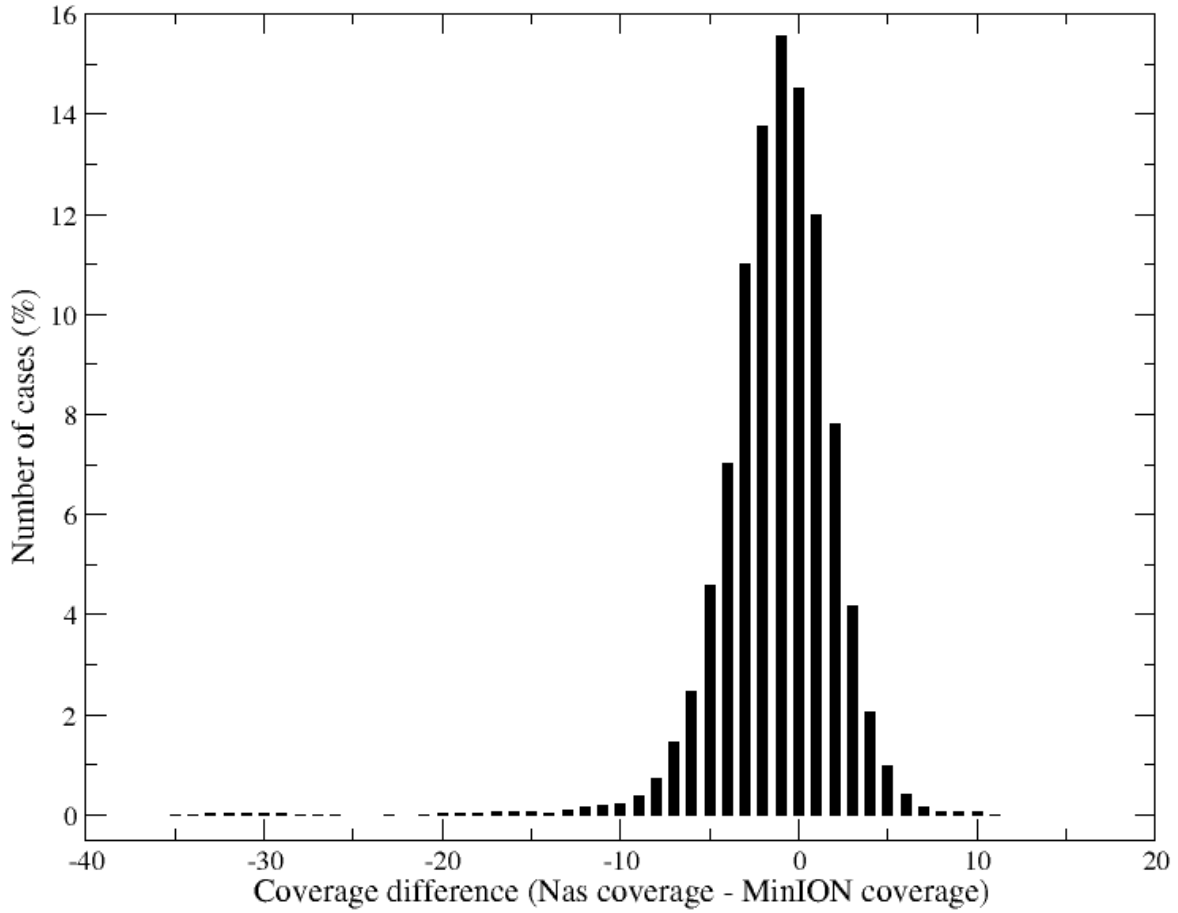

**Figure S4. Comparison of MinION® and NaS read coverage.** For each base of the reference genome, we computed the difference between coverage in NaS and MinION® reads. A negative value indicates a lower coverage in NaS read, whereas a positive value indicates a higher coverage in NaS read.

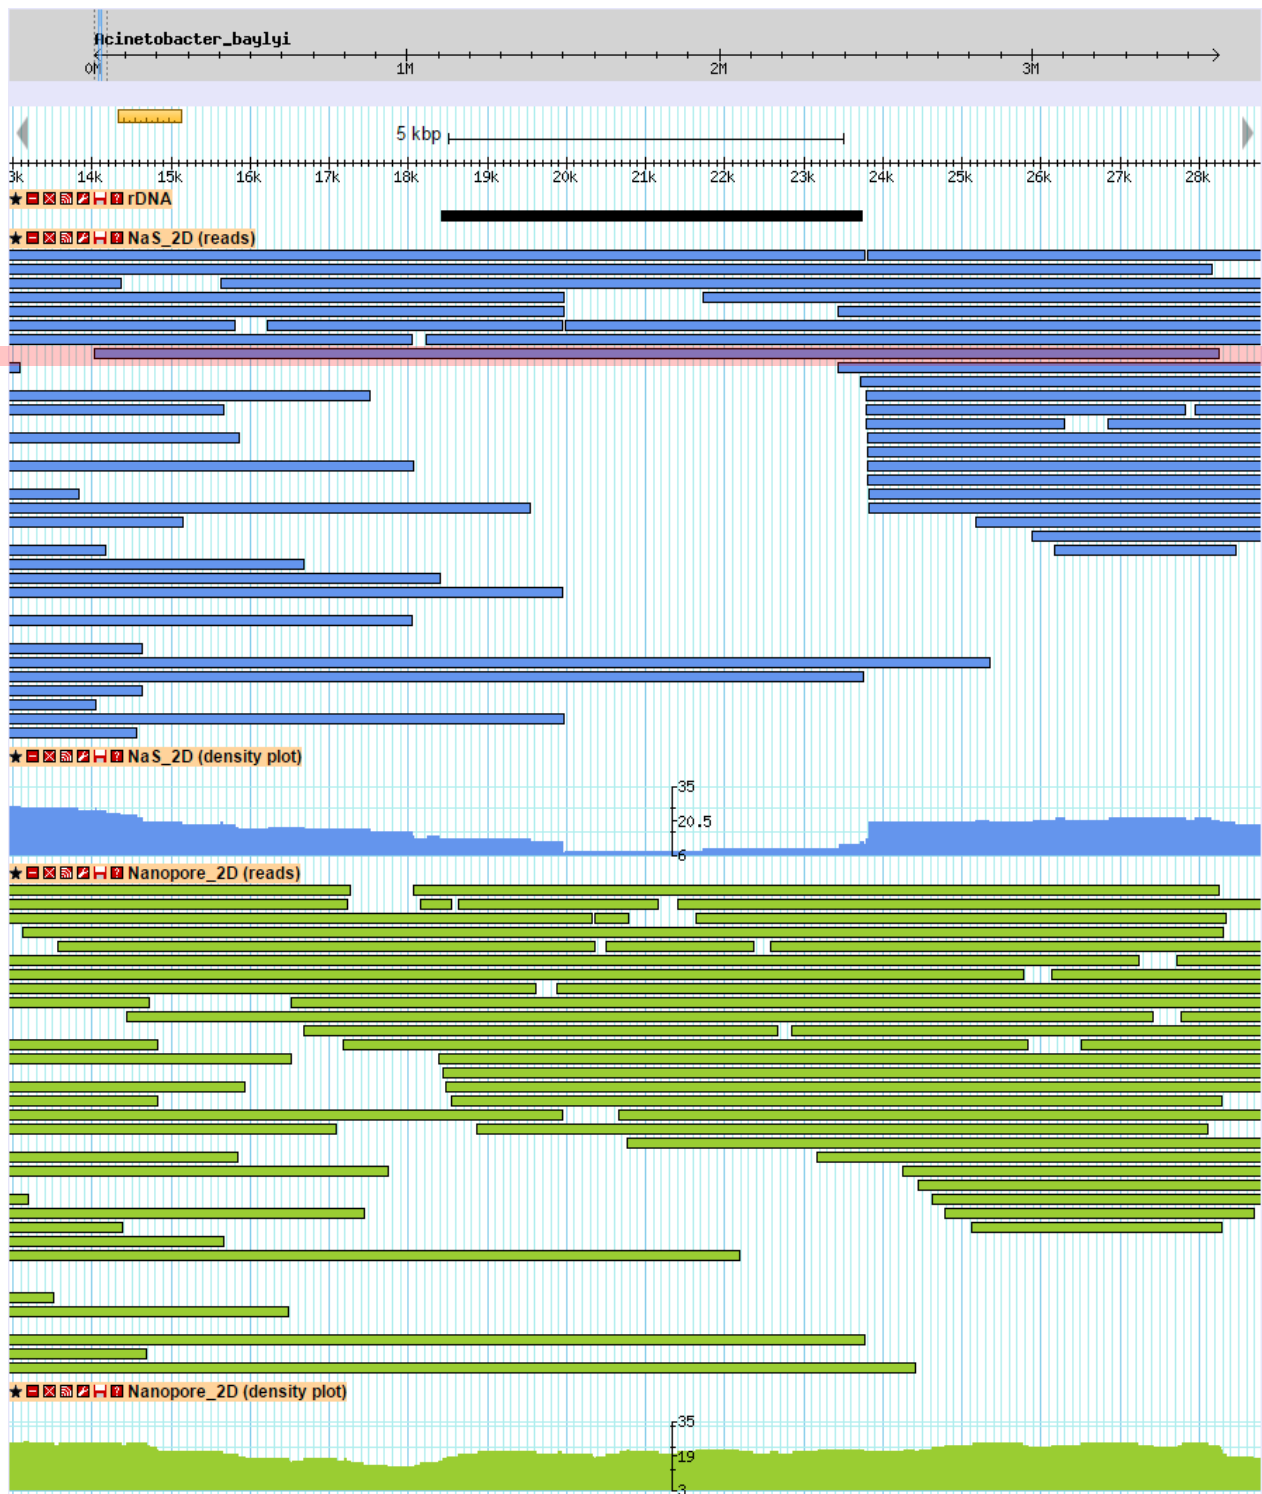

**Figure S5. Overview of rDNA cluster 1 of *Acinetobacter baylyi* ADP1.** The figure shows a capture of the rDNA1 genomic region from *Acinetobacter baylyi* ADP1 (from 18 kb to 24kb). The first track contains rDNA cluster 1 (black rectangle). The blue rectangles represent alignments of 2D NaS reads, whereas green rectangles represent alignments of 2D MinION® reads. The two plots represent respectively the coverage of Nas 2D (blue) and MinION® 2D (green) reads. The 19,726 bp NaS read cited in the main text is surrounded with a red rectangle. As discussed in the main text, we observed a lower NaS read coverage around repetitive region in contrast with the MinION® read coverage.

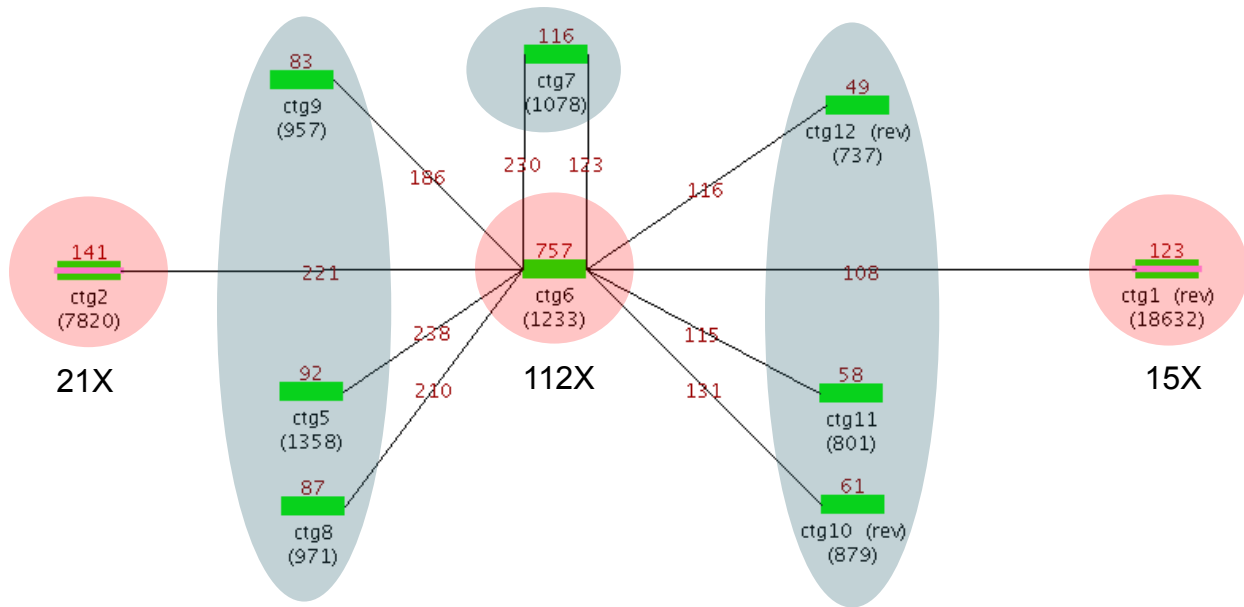

**Figure S6.** Example of a *contig-graph* generated from a read spanning a repeated region. Contigs encircled in red shading (ctg2, ctg6 and ctg1) are contigs covered by *seed-reads* (coverage is stated in black). Contigs surrounded by blue shading are *foreign-contigs*. Using the Floyd-Warshall algorithm, the following path has been extracted from the graph: ctg2 – ctg6 – ctg1, leading to a 27,685 bp NaS read. Red and black numbers represent respectively the coverage (*seed-reads* and *recruited-reads*) and the length of the corresponding contig.

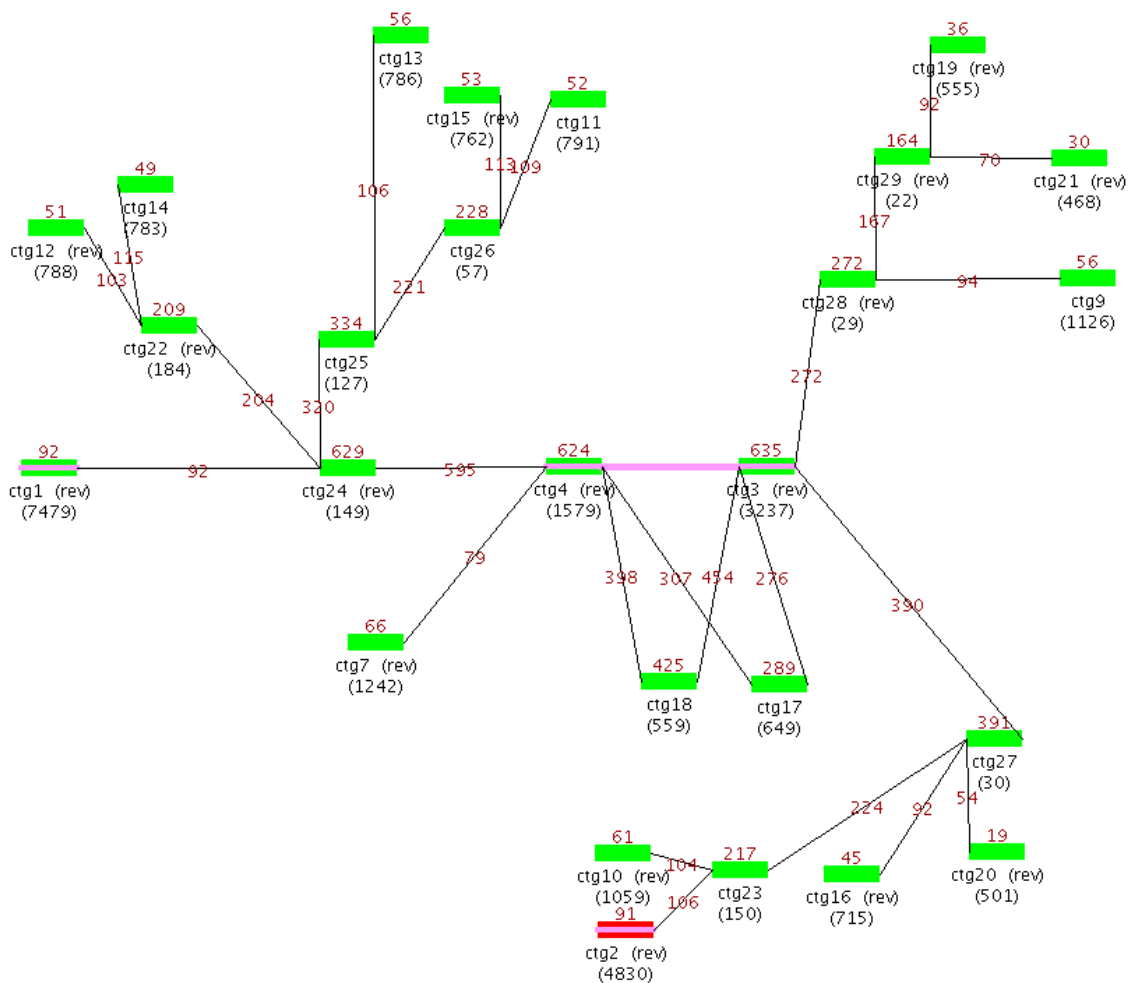

**Figure S7.** Example of a *contig-graph* generated from a read spanning an rDNA locus. Contigs are green boxes; length and coverage of a given contig are respectively the black number in bracket under contig name and the red number over contig name. This graph structure shows 7 sources (ctg1, ctg12, ctg14, ctg13, ctg15, ctg11 and ctg7) and 7 sinks (ctg19, ctg21, ctg9, ctg20, ctg2, ctg16 and ctg10) representing the seven rDNA clusters of *Acinetobacter baylyi* ADP1. Using the Floyd-Warshall algorithm, the following path has been extracted from the graph: ctg1 – ctg24 – ctg4 – ctg17 – ctg3 – ctg27 – ctg23 – ctg2.



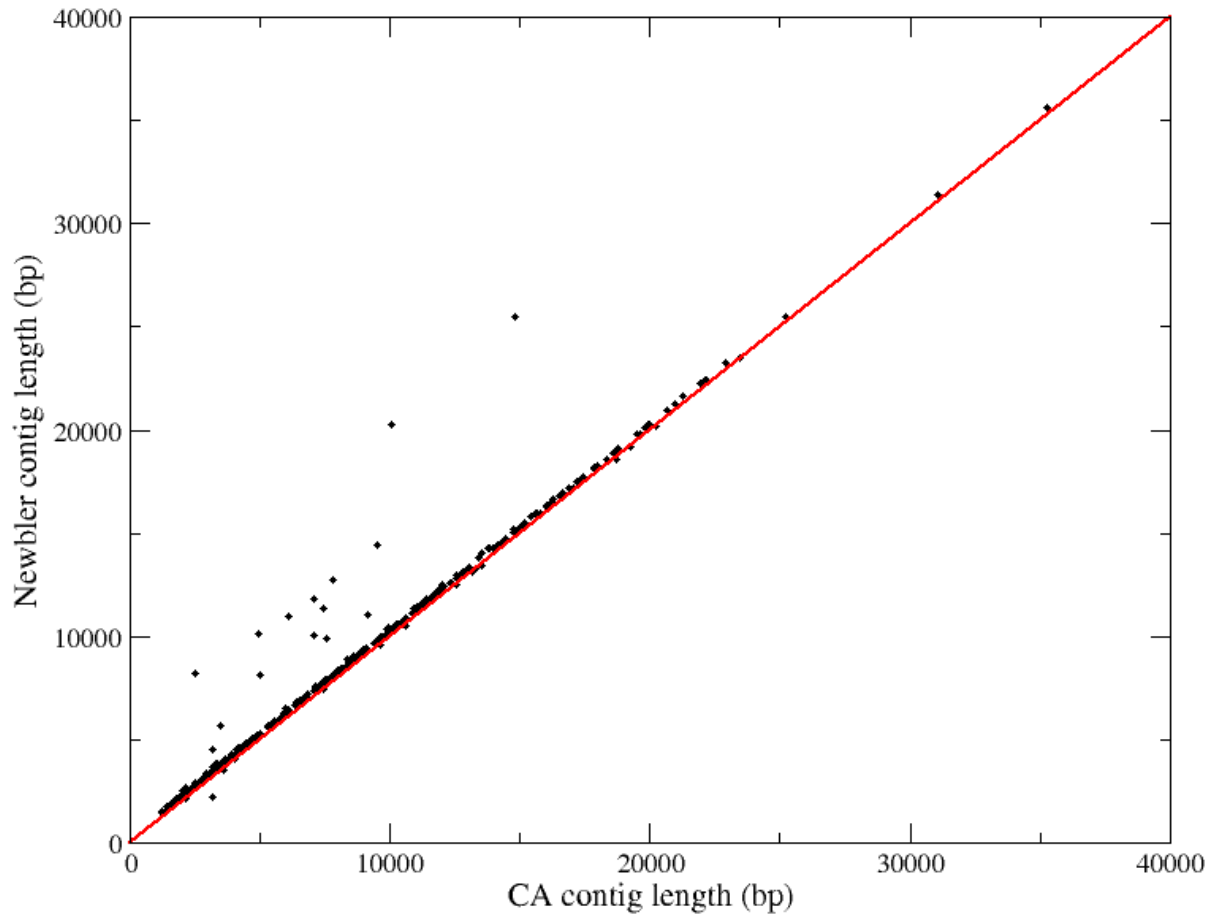

**Figure S8. Comparison of Celera assembler and Newbler contig length.** The figure shows a comparison of synthetic read size produced using CA (x axis) and Newbler (y axis).

**Table S1.** Summary statistics of MinION® sequencing (R7 and R7.3 chemistries) and NaS reads

| Read set                               | R 7           |             | R 7.3         |               |
|----------------------------------------|---------------|-------------|---------------|---------------|
|                                        | 1D            | 2D          | 1D            | 2D            |
| # reads                                | 12,086        | 1,145       | 45,825        | 7,436         |
| # reads (>10Kb)                        | 638           | 275         | 2,971         | 3,591         |
| Cumulative size (Mbp)                  | 32.3          | 8.3         | 86.6          | 77.7          |
| Average size (bp)                      | 2,672         | 7,292       | 1,888         | 10,455        |
| MinION®<br>reads aligned<br>using LAST | N50 size (bp) | 6,988       | 9,641         | 12,878        |
|                                        | Max size (bp) | 121,776     | 37,578        | 123,135       |
| Aligned reads                          | 3,451 (28.5%) | 870 (76.0%) | 6,172 (13.5%) | 6,270 (84.3%) |
| Mean identity percent                  | 57.30%        | 68.67%      | 56.45%        | 75.05%        |
| Max alignment size                     | 35,340        | 36,595      | 54,158        | 58,656        |
| Error-free reads                       | 0             | 0           | 0             | 0             |
| # reads                                | 736           | 797         | 3,981         | 5,761         |
| # reads (>10Kb)                        | 23            | 197         | 144           | 2,848         |
| Cumulative size (Mbp)                  | 2.6           | 5.9         | 14.6          | 59.7          |
| Average size (bp)                      | 3,507         | 7,396       | 3,663         | 10,370        |
| NaS reads<br>aligned using<br>bwa mem  | N50 size (bp) | 4,051       | 9,546         | 4,306         |
|                                        | Max size (bp) | 16,962      | 35,576        | 31,283        |
| Aligned reads                          | 736 (100%)    | 797 (100%)  | 3,981 (100%)  | 5,761 (100%)  |
| Mean identity percent                  | 99.9982%      | 99.9935%    | 99.9929%      | 99.9888%      |
| Max alignment size                     | 16,962        | 35,576      | 31,283        | 59,863        |
| Error-free reads                       | 97.1%         | 97.7%       | 98.1%         | 96.0%         |

**Table S2.** Comparative summary of MinION<sup>®</sup> and proofread reads.

|                       | MinION <sup>®</sup> reads | proofread    |
|-----------------------|---------------------------|--------------|
| # reads               | 543                       | 543          |
| # reads (>10Kb)       | 234                       | 234          |
| Cumulative size (Mbp) | 5.2                       | 5.2          |
| Average size (bp)     | 9,615                     | 9,621        |
| N50 size (bp)         | 11,226                    | 11,273       |
| Max size (bp)         | 37,578                    | 36,598       |
| Aligned reads         | 344 (63.35%)              | 344 (63.35%) |
| Mean identity percent | 61.611%                   | 71.5677%     |
| Max alignment size    | 36,623                    | 35,643       |
| Error-free reads      | 0                         | 0            |

**TableS3.** Performance comparison of BLAT, BWA, BWA mem and Bowtie2 programs.

| Assembly programs | BLAT                                            | BWA        | BWA mem | Bowtie 2   |       |
|-------------------|-------------------------------------------------|------------|---------|------------|-------|
| Version           | 36                                              | 0.7.10     | 0.7.10  | 2.2.4      |       |
| Parameters        | tileSize=10<br>stepSize = 5                     | -l 10 -k 0 | -k 10   | -N 0 -L 10 |       |
| 3,477 1D<br>reads | CPU time (seconds)                              | 654        | 39      | 3,986      | 1,155 |
|                   | Number of MinION reads<br>with at least one hit | 745        | 0       | 336        | 1     |
| 543 2D<br>reads   | CPU time (seconds)                              | 578        | 26      | 2,525      | 1,060 |
|                   | Number of MinION reads<br>with at least one hit | 353        | 4       | 325        | 50    |

**Table S4.** Performance comparison of Newbler, MIRA and Celera assembler (CA). Final contigs were aligned using BWA mem software.

| Assembly programs             | Newbler             | MIRA                                                | CA                                                                                                                              |
|-------------------------------|---------------------|-----------------------------------------------------|---------------------------------------------------------------------------------------------------------------------------------|
| Parameters                    | -urt -mi 98         | job = genome,denovo,accurate<br>technology = solexa | ovlHashBits = 25 ; cnsMinFragments = 1 ; ovlErrorRate = 0.1 ; cnsErrorRate = 0.1 ; utgErrorRate = 0.1 ; utgGraphErrorRate = 0.1 |
| # reads                       | <b>353</b>          | 242                                                 | 352                                                                                                                             |
| # reads (>10Kb)               | <b>148</b>          | 117                                                 | 135                                                                                                                             |
| Cumulative size (Mbp)         | <b>3.30</b>         | 2.7                                                 | 3.14                                                                                                                            |
| Average size (bp)             | 9,368               | <b>11,175</b>                                       | 8,912                                                                                                                           |
| N50 size (bp)                 | 11,790              | <b>11,947</b>                                       | 11,473                                                                                                                          |
| Max size (bp)                 | <b>35,585</b>       | 34,954                                              | 35,288                                                                                                                          |
| Aligned reads                 | <b>353 (100%)</b>   | <b>242 (100%)</b>                                   | <b>352 (100%)</b>                                                                                                               |
| Mean identity percent         | <b>99.9998%</b>     | 99.9891%                                            | 99.9982%                                                                                                                        |
| Error-free reads              | <b>349 (98.86%)</b> | 93 (38.42%)                                         | 325 (92.32%)                                                                                                                    |
| Coverage of the reference     | <b>59.2%</b>        | 52.0%                                               | 57.2%                                                                                                                           |
| Average CPU time (seconds)    | <b>5.6</b>          | 26                                                  | 105                                                                                                                             |
| Cumulative CPU time (seconds) | <b>566</b>          | 2,603                                               | 10,947                                                                                                                          |

**Table S5.** Celera assembler parameters used to assemble NaS reads.

|                    |          |
|--------------------|----------|
| merSize            | 17       |
| merThreshold       | 0        |
| merDistinct        | 0.9995   |
| merTotal           | 0.995    |
| doOBT              | 1        |
| unitigger          | bogart   |
| ovlErrorRate       | 0.1      |
| utgGraphErrorRate  | 0.1      |
| utgMergeErrorRate  | 0.1      |
| cnsErrorRate       | 0.1      |
| cgwErrorRate       | 0.1      |
| ovlConcurrency     | 24       |
| cnsConcurrency     | 24       |
| ovlThreads         | 1        |
| ovlHashBits        | 22       |
| ovlHashBlockLength | 10000000 |
| ovlRefBlockSize    | 10000    |
| cnsReuseUnitigs    | 1        |
| cnsMinFrag         | 100      |
| cnsPartitions      | 64       |

**Table S6.** Celera assembler parameters used to assemble Illumina reads.

|                                |           |
|--------------------------------|-----------|
| ovlConcurrency                 | 4         |
| ovlThreads                     | 8         |
| ovlCorrConcurrency             | 20        |
| ovlCorrBatchSize               | 1000      |
| ovlHashBits                    | 25        |
| ovlRefBlockSize                | 4000000   |
| ovlHashBlockLength             | 100000000 |
| cnsConcurrency                 | 48        |
| cnsMinFrag                     | 100       |
| frgCorrConcurrency             | 20        |
| frgCorrBatchSize               | 1000      |
| frgCorrThreads                 | 4         |
| frgCorrOnGrid                  | 1         |
| merylThreads                   | 20        |
| merylMemory                    | 100000    |
| mbtConcurrency                 | 20        |
| mbtThreads                     | 4         |
| ovlErrorRate                   | 0.02      |
| utgGraphErrorRate              | 0.01      |
| merOverlapperExtendConcurrency | 12        |
| merOverlapperSeedConcurrency   | 12        |
| merOverlapperThreads           | 4         |
| utgGenomeSize                  | 3600000   |
| unitigger                      | bogart    |
